# Supplementary material for: Transcriptomic analysis reveals mitochondrial pathways associated with distinct adolescent behavioral phenotypes and stress response
Source: PubMed Central journal article supplement (PMC10656500; doi:10.1038/s41398-023-02648-3), 2023-11-17
Supplement: 41398_2023_2648_MOESM1_ESM.pdf [file 41398_2023_2648_MOESM1_ESM.pdf]

## Supplementary material

# Transcriptomic analysis reveals mitochondrial pathways associated with distinct adolescent behavioral phenotypes and stress response

Thamyris Santos-Silva, Doğukan Hazar Ülgen, Caio Fábio Baeta Lopes, Francisco Silveira Guimarães, Luciane Carla Alberici, Carmen Sandi, Felipe Villela Gomes

## RESULTS

### Revealing individual behavioral variability

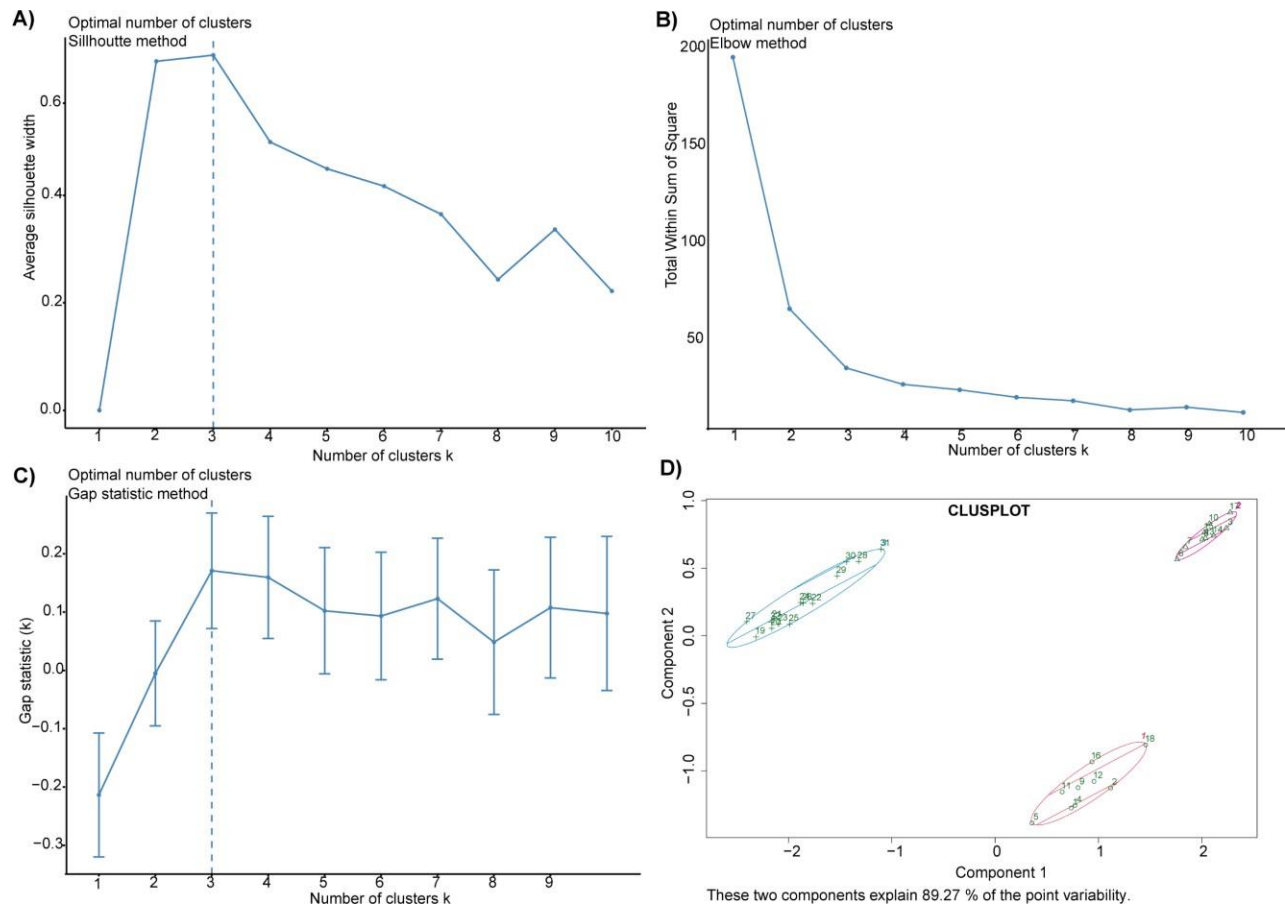

**Supplementary Figure 1.** Optimal number of clusters. The optimal number of clusters (3) was determined by Silhouette (A), Elbow (B) and Gap statistic methods (B) before applying the k-means clustering algorithm in the z-normalized behavioral data set (D).

## RESULTS

### Transcriptomic analysis of the PFC reveals changes in mitochondrial pathways

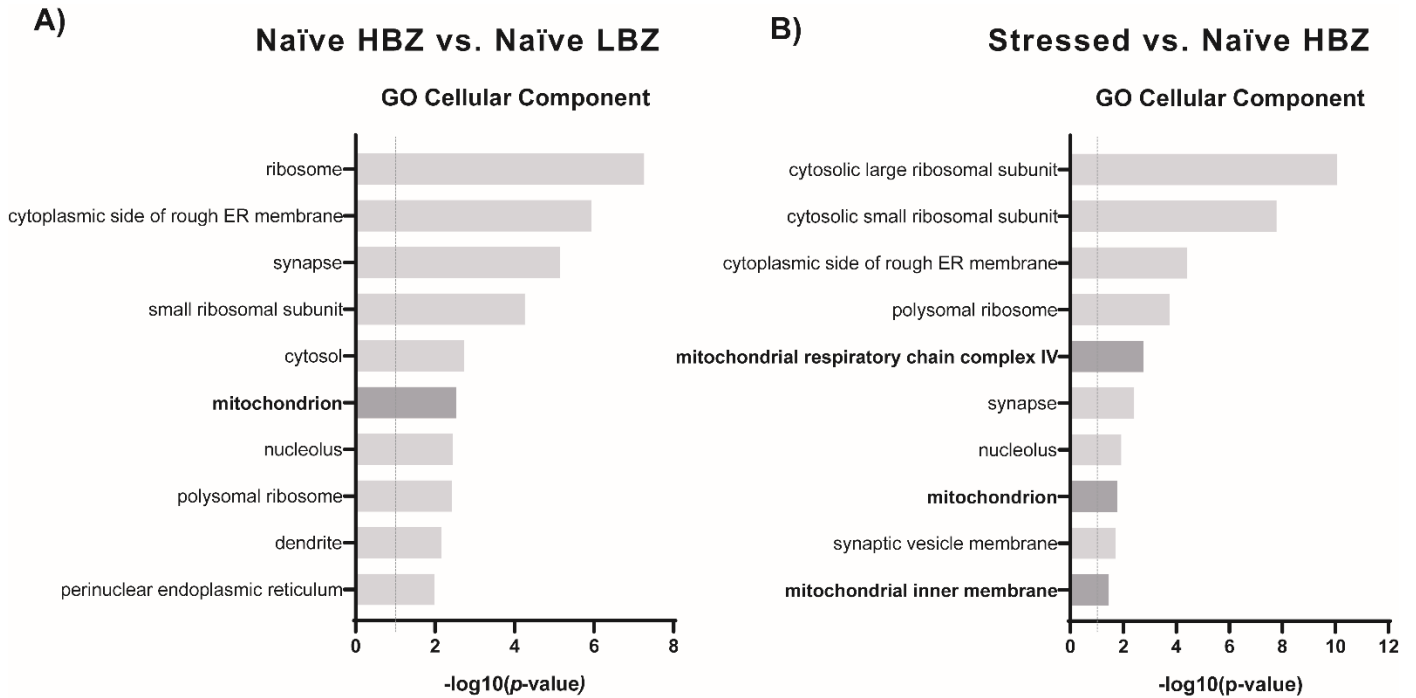

**Supplementary Figure 2. Gene ontology – cellular component classes.** Gene set enrichment analysis of DEGs in the PFC of naïve LBZ and **(A)** stressed animals **(B)** compared to naïve HBZ. Mitochondrial pathways are highlighted in black font.

## RESULTS

### Expression profiles of mitochondria-associated genes in the PFC relate to behavioral phenotypes

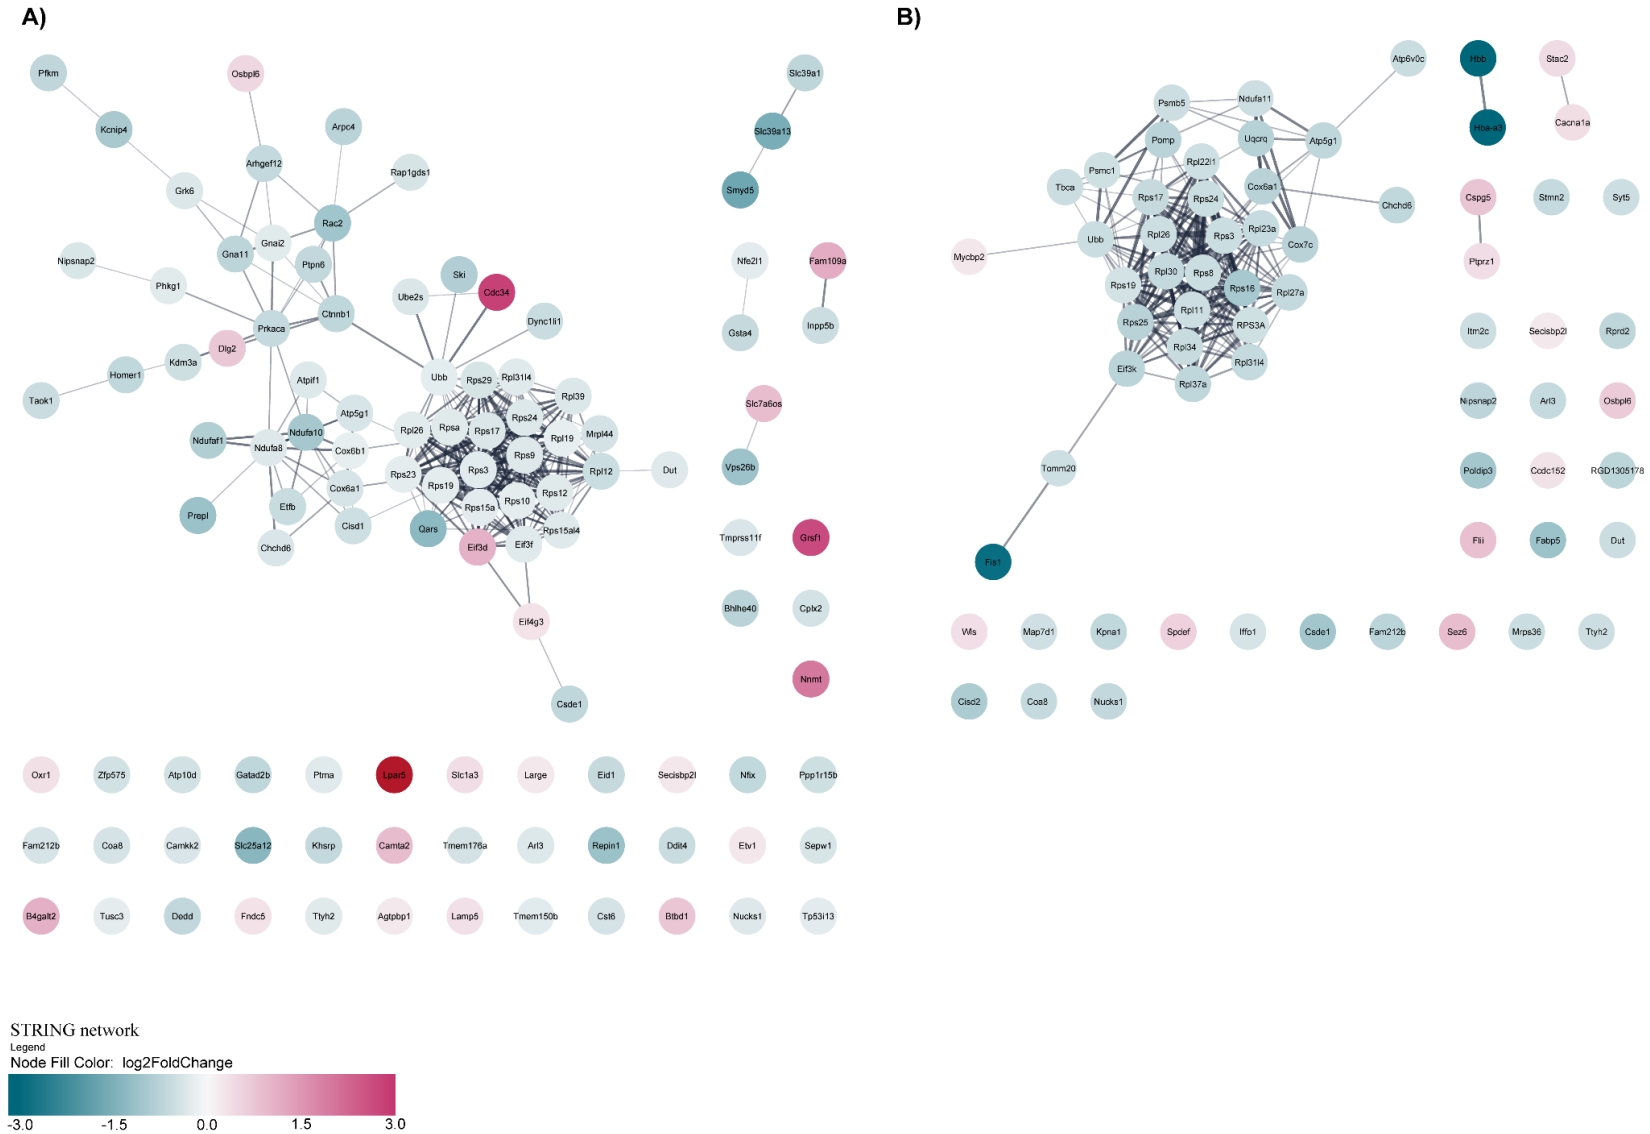

**Supplementary Figure 3. Gene-gene interactive networks and non-connected DEGs.** DEGs were mapped onto interaction networks using Cytoscape software for Naïve LBZ (**A**) and stressed animals (**B**). Nodes corresponding to DEGs, and edges equivalent to predicted functional and/or physical interactions with a 0.4 confidence score cut-off. The nodes colors represent the corresponding genes' relative expression ( $\log_2(\text{Fold Change})$ ).
